# Predictors of car smoking rules among smokers in France, Germany and the Netherlands

Sara C. Hitchman<sup>1</sup>, Romain Guignard<sup>2</sup>, Gera E. Nagelhout<sup>3,4</sup>, Ute Mons<sup>5</sup>, François Beck<sup>2,6</sup>, Bas van den Putte<sup>7</sup>, Mathilde Crone<sup>8</sup>, Hein de Vries<sup>3</sup>, Andrew Hyland<sup>9</sup>, Geoffrey T. Fong<sup>1,10</sup>

1 Department of Psychology, University of Waterloo, Waterloo, Canada

2 French Institute for Health Promotion and Health Education (INPES), Saint-Denis, France

3 Maastricht University/CAPHRI, Maastricht, the Netherlands

4 STIVORO for a smoke free future, The Hague, the Netherlands

5 Unit Cancer Prevention and WHO Collaborating Centre for Tobacco Control, German Cancer Research Center (DKFZ), Heidelberg, Germany

6 Cermes3-Cesames team (Research Centre Medicine, Sciences, Health, Mental Health, Health Policy), University of Paris Descartes, EHESS, Paris, France

7 Amsterdam School of Communications Research, ASCoR, University of Amsterdam, Amsterdam, The Netherlands

8 Leiden University Medical Center, Department of Public Health and Primary Care, Leiden, The Netherlands

9 Department of Health Behavior, Roswell Park Cancer Institute, Buffalo, New York, USA

10 Ontario Institute for Cancer Research, Toronto, Canada

**Correspondence:** Sara C. Hitchman, MAsc., Department of Psychology, University of Waterloo, Waterloo, Ontario, Canada, N2L 3G1, T: +011 519 888 4567 x 33597, e-mail: schitchm@uwaterloo.ca

**Background:** As exposure to tobacco smoke pollution (TSP) has been identified as a cause of premature death and disease in non-smokers, and studies have demonstrated that smoking in cars produces high levels of TSP, this study will investigate smokers' rules for smoking in their cars, and predictors of car smoking rules, including potentially modifiable correlates.

**Methods:** Data were drawn from nationally representative samples of current smokers from the International Tobacco Control Policy Evaluation Project surveys in France (2007), Germany (2007), and the Netherlands (2008). Smokers in France and Germany were asked about smoking rules in their cars, and smokers in the Netherlands were asked about smoking rules in cars carrying children. **Results:** In France and Germany, 59% and 52% of smokers respectively, allowed smoking in their cars. In the Netherlands, 36% of smokers allowed smoking in cars carrying children. Predictors of allowing smoking in cars included: being a daily vs. non-daily smoker, being younger vs. older age, having no (young) children in the home, being a heavier smoker, and allowing smoking in the home. In the Netherlands, smokers who agreed that TSP is dangerous to non-smokers were less likely to allow smoking in cars carrying children. **Conclusion:** Overall, a sizeable proportion of smokers allowed smoking in their cars across the three countries. Media campaigns with information about the dangers of TSP may increase the adoption of smoke-free cars. These media campaigns could target smokers who are most likely to allow smoking in cars.

## Introduction

Tobacco smoke pollution (TSP) killed an estimated 172,300 people in the European region in 2004.<sup>1</sup> TSP has been identified as carcinogenic to humans and a cause of death and disease in non-smokers.<sup>2–4</sup> Childhood exposure to TSP puts children at risk for disease and death, including sudden infant death syndrome, and middle ear and respiratory infections.<sup>3</sup>

Primary sources of TSP exposure include public places with no comprehensive smoke-free rules, and private homes and cars where smoking is allowed. Air quality monitoring studies show that smoking in cars produces dangerous levels of TSP, even if compensatory measures are taken, i.e., opening a window.<sup>5–10</sup> Additionally, a longitudinal study found that exposure to TSP in cars was related to increased incidence of persistent wheeze in 14 year olds.<sup>11</sup> Another study found an association between children's exposure to TSP in cars, and respiratory and allergic symptoms.<sup>12</sup> Several jurisdictions, including states/provinces in Australia and Canada, have now banned smoking in cars carrying children because of children's vulnerability to environmental health hazards (e.g., do not have the same ability as adults to protect themselves from TSP).<sup>13,14</sup>

The 2009 Eurobarometer survey found that of smokers in the European Union (EU), 42% allowed smoking all the time in their car, 23% sometimes, and 35% never.<sup>15</sup> Yet, despite the health harms posed by TSP in cars, few studies have examined the predictors of smoking in cars in Europe, and only one study has

done so using a nationally representative sample of smokers (in the UK (United Kingdom)).<sup>15–19</sup>

This study will investigate predictors of smoking in cars among nationally representative samples of smokers from the International Tobacco Control (ITC) Europe Project Surveys in France, Germany, and the Netherlands. The ITC Project (comprised of prospective cohort surveys of representative samples of smokers and non-smokers in 20 countries) is designed to evaluate the psychosocial and behavioural impact of the Framework Convention on Tobacco Control (FCTC).<sup>20,21</sup> Because the ITC survey questions sometimes differ across countries depending on national priorities, the measure of smoking in cars for France and Germany is different than in the Netherlands. Thus, in France and Germany, predictors of car smoking rules will be examined, whereas, in the Netherlands, predictors of smoking rules in cars carrying children will be examined.

The current study is an extension of research from a previous study that examined predictors of smoking in cars with non-smokers among smokers from the ITC Four Country Project in Australia, Canada, the UK and the United States (USA), thus, it will follow similar methods.<sup>19</sup> The current study will examine predictors of smoking in cars, including characteristics of respondents, smoking behaviour (quit intentions and heaviness of smoking index (HSI)), and potentially modifiable correlates that could be addressed by public health policy (knowledge of harms of TSP to non-smokers and rules for smoking in the home). Understanding

what factors are related to smoking in cars may help inform policies to encourage the adoption of smoke-free cars.

## Methods

### Respondents

Respondents were adult smokers ( $\geq 18$  years) from France (N=1,604), Germany (N=1,361), and the Netherlands (N=1,187). All data is from Wave 1 of each country's ITC project survey. Survey dates were: France (December 2006–February 2007), Germany (July–November 2007), and the Netherlands (April 2008). Samples were stratified geographically, with the exception of France where the design was a simple random sample. All analyses were weighted on sex and age to ensure that smokers in the surveys were nationally representative of smokers in the general population.

Respondents from France and Germany were selected using random digit dialling. Interviews were conducted using computer assisted telephone interviewing (CATI). In the Netherlands, two different sampling and survey modes were used: (1) a CATI sample (N=404), and (2) a computer assisted web interviewing (CAWI) sample (N=1,668). Respondents for the CAWI sample were drawn from a population-based internet panel, TNS NIPObase.<sup>22</sup> For this paper, only the CAWI sample was used because the shorter CATI survey did not include the measure of interest. Further details on methodology may be found elsewhere.<sup>23–26</sup>

### Measures

*Car smoking rules (Germany and France):* Smokers were asked: "What are the rules about smoking in your family car or cars? Would you say . . . smoking is never allowed in any car, smoking is allowed sometimes or in some cars, smoking is allowed in all cars, or do not have a family car." For the main analyses, responses were dichotomised as: smoking is allowed sometimes/in all cars vs. never allowed. Rules for smoking in cars were dichotomised in this way because no level of TSP has been shown to be risk-free.<sup>3</sup> Respondents who did not have a car were excluded (Germany, n=139; France, n=121).

*Rules for smoking in cars carrying children (Netherlands):* "What are the rules about smoking in your family car or cars when there are children in the car? Would you say . . . smoking is never allowed in any car, smoking is allowed sometimes or in some cars, smoking is allowed in all cars, do not have a car, or I never have children in my car." For the main analyses responses were coded as: smoking is allowed sometimes/in all cars vs. never allowed. Respondents who did not have a car or who never had children in the car were excluded (n=449).

*Characteristics of respondents:* Characteristics included: sex, age, minority status, education, age of youngest child in the home, and smoking status. See Table 1 for variable categories. Minority status was coded as: France (French language only spoken in the home vs. otherwise), Germany (German nationality vs. otherwise), and the Netherlands (both parents born in the Netherlands vs. otherwise).

*Heaviness of Smoking Index:* HSI is a composite measure of nicotine dependence, consisting of cigarettes per day (0–10, 11–20, 21–30, or >30), and minutes to first cigarette after waking (<5, 6–30, 31–60, or >60).<sup>27</sup>

*Intentions to quit smoking:* Respondents were asked if they had plans to quit within the next month, within the next six months, sometime in the future-beyond six months, or no plans to quit. Intentions to quit were dichotomised as plan to quit in the next six months vs. otherwise.

*Knowledge and beliefs about TSP:* Respondents were asked: "Based on what you know, does smoking cause lung cancer in non-smokers from secondhand smoke?" Response categories were: yes or no. "Don't know" responses were categorized separately. Respondents were also asked whether they

strongly agreed, agreed, neither agreed nor disagreed, disagreed, or strongly disagreed with the statement: Cigarette smoke is dangerous to non-smokers. Responses were coded as strongly agree/agree vs. otherwise. Because there were very few "don't know," responses, don't knows were grouped into the latter category.

*Rules for smoking in homes:* Respondents were asked to describe smoking inside their home: smoking is allowed anywhere inside your home, smoking is allowed in some rooms inside your home, smoking is never allowed inside your home, or smoking is not allowed inside your home except under special circumstances. Responses were coded as smoking is never allowed vs. otherwise.

### Statistical analyses

All analyses were conducted with SAS 9.2 using weighted data, except for the characteristics of respondents displayed in Table 1. Respondents who otherwise met selection criteria with missing data were deleted from all analyses (21 in the Netherlands, 10 in France, and 13 Germany). Predictors of allowing smoking in cars in Germany and France, and allowing smoking in cars carrying children in the Netherlands, were tested in separate models for each country. The model used a three stage logistic regression analysis with the dichotomised dependent variable (smoking is allowed sometimes/in all cars vs. never allowed). In the first stage of the model, respondent characteristics were examined. In the second stage, smoking behaviour correlates (HSI and quit intentions) were added, and in the third stage, modifiable correlates (knowledge and beliefs about TSP and rules for smoking in homes) were added. All variables were treated as categorical except for HSI, which was treated as continuous. The three stage model was used so that respondent characteristics could be examined independently of other predictors, and the respondent characteristics and smoking behaviour correlates could be examined independently of modifiable correlates. Omnibus test statistics for overall trend of the categorical variables were examined in the models at each stage.

Car smoking rules in Germany and France were compared by (1) examining differences in car smoking rules on the non-dichotomised car smoking rules variable in an unadjusted analyses using the adjusted Rao-Scott Chi-Square test (Rao-Scott accounts for survey design), and (2) combining the two countries in a single logistic regression model, adding country as a covariate, and controlling for all covariates with the dichotomised dependent variable.

## Results

*Characteristics of respondents:* See Table 1. Some notable differences across the countries include more males and fewer older smokers in the Netherlands sample, a lower percentage of smokers in France with no children in the household, and fewer minority status smokers in Germany (likely because of different definitions of minority status).

### Car smoking rules and predictors of rules in France and Germany

*Car smoking rules:* In France, 41% never allowed smoking in their car, 40% sometimes allowed smoking in their car, and 19% always allowed smoking. In Germany, 48% never allowed smoking in their car, 28% sometimes allowed smoking, and 24% always allowed smoking. Differences in car smoking rules between the two countries were significant,  $\chi^2(2, N=2965) = 36.99, p < 0.001$ .

*Characteristics of respondents:* See Table 2 for results. In Germany, younger smokers, daily smokers and those who had no children compared to a youngest child 1–5 years, were more likely to allow smoking in their cars. In France, younger smokers, daily smokers, and those who had no children compared to a

**Table 1** Characteristics of Respondents by Country<sup>a</sup>

| Demographics and Smoking Status | Germany (N = 1,361) |     | France (N = 1,604) |     | Netherlands (N = 1,187) |     |
|---------------------------------|---------------------|-----|--------------------|-----|-------------------------|-----|
|                                 | n                   | %   | n                  | %   | n                       | %   |
| Sex                             |                     |     |                    |     |                         |     |
| Female                          | 712                 | 52% | 831                | 52% | 548                     | 46% |
| Male                            | 649                 | 48% | 773                | 48% | 639                     | 54% |
| Age Group*                      |                     |     |                    |     |                         |     |
| 18–24                           | 195                 | 14% | 202                | 13% | 170                     | 14% |
| 25–39                           | 342                 | 25% | 601                | 37% | 456                     | 38% |
| 40–54                           | 563                 | 41% | 607                | 38% | 353                     | 30% |
| 55+                             | 261                 | 19% | 194                | 12% | 208                     | 18% |
| Education*                      |                     |     |                    |     |                         |     |
| Low                             | 291                 | 22% | 717                | 45% | 395                     | 33% |
| Moderate                        | 524                 | 39% | 579                | 36% | 552                     | 47% |
| High                            | 546                 | 40% | 308                | 19% | 240                     | 20% |
| Minority Status*                |                     |     |                    |     |                         |     |
| Majority                        | 1310                | 96% | 1405               | 88% | 1089                    | 92% |
| Minority                        | 51                  | 4%  | 199                | 12% | 98                      | 8%  |
| Youngest Child*                 |                     |     |                    |     |                         |     |
| No children in household        | 890                 | 65% | 839                | 52% | 727                     | 61% |
| Under 1                         | 24                  | 2%  | 50                 | 3%  | 41                      | 4%  |
| 1–5 years                       | 119                 | 9%  | 256                | 16% | 155                     | 13% |
| 6–12 years                      | 194                 | 14% | 268                | 17% | 144                     | 12% |
| 13–17 years                     | 134                 | 10% | 191                | 12% | 120                     | 10% |
| Smoking Status                  |                     |     |                    |     |                         |     |
| Daily Smoker                    | 1239                | 91% | 1445               | 90% | 1067                    | 90% |
| Monthly/Weekly Smoker           | 122                 | 9%  | 159                | 10% | 120                     | 10% |

a: Unweighted Frequencies and Sample Sizes

\*denotes significantly different across countries at  $p < 0.0001$

youngest child 6–12 years, were more likely to allow smoking in their cars. Overall, there seemed to be a general trend towards smokers with younger children to be less likely to smoke in cars.

*Smoking behaviour correlates:* See Table 3 for results. In both Germany and France, smokers with no intentions to quit, and more nicotine dependent smokers (higher HSI) were more likely to allow smoking in cars.

*Modifiable correlates:* See Table 4 for results. In both Germany and France, smokers who did not have a smoke-free home were more likely to allow smoking in cars. Knowledge that TSP causes lung cancer and agreement that TSP is dangerous to non-smokers were not significantly related to car smoking rules.

*Differences in car smoking rules (Germany vs. France):* In a logistic regression analysis combining Germany and France, with adjustment for covariates listed in Tables 2, 3, and 4 and with country added as a dummy variable, French smokers had 1.48 times higher odds than German smokers of always allowing smoking in their cars (95% CI = 1.20– 1.82),  $p < 0.001$ .

### Rules for smoking in cars carrying children and predictors of rules in the Netherlands

*Rules for smoking in cars carrying children (Netherlands):* In the Netherlands, 64% of smokers reported smoking was never allowed in cars carrying children, 26% reported smoking was sometimes allowed, and 10% reported smoking was always allowed.

*Characteristics of respondents:* See Table 2 for results. In the Netherlands, smokers who were 18–24 years old were more likely to allow smoking in cars with children than smokers who were 55 years or older. Smokers with low education were more likely to allow smoking in cars carrying children than smokers with high education, as were daily compared to non-daily smokers.

*Smoking behaviour correlates:* See Table 3 for results. More nicotine dependent smokers (higher HSI) were more likely to allow smoking in cars.

*Modifiable correlates:* See Table 4 for results. In the Netherlands, smokers without a smoke-free home, and smokers who did not agree that TSP was dangerous to non-smokers were more likely to

allow smoking in cars carrying children. Knowledge that TSP causes lung cancer was not associated with car smoking rules.

*Omnibus tests.* Examination of the overall omnibus test statistics for categorical variables in all three models (Tables 2, 3, and 4) showed that for all categorical level variables that showed significant subgroup differences, the overall omnibus test for trend was also significant at the  $p < 0.05$  level.

## Discussion

Overall, this study showed that significant proportions of smokers in France (59%), Germany (52%), and the Netherlands (36% in cars carrying children) allow smoking in their cars.

In France and Germany, where predictors of car smoking rules were examined, smokers in France were more likely to allow smoking in cars than smokers in Germany. This is consistent with the 2009 Eurobarometer that found that smokers from Germany were less likely to allow smoking in cars.<sup>15</sup> Data on the prevalence of smoke-free homes also shows that a higher percentage of smokers in Germany (30%) never allow smoking in their homes compared to France (23%).<sup>28</sup> Reasons for country differences are uncertain, smokers may avoid smoking in their cars because of health concerns, cleanliness, to preserve car value, and/or to minimise distractions while driving.<sup>29,30</sup>

Overall, predictors of smoking in cars were similar across France and Germany. Respondent characteristics that predicted smoking in cars included: younger age, daily smoking, and older/no children in the home. Younger smokers may be more likely to allow smoking in their cars if they spend more time with friends compared to family/children. The trend towards smokers with (younger) children being less likely to smoke in cars provides some evidence that smokers are aware of the serious health effects of TSP on children. Previous studies have indeed found that having younger children is related to smoke-free homes/preventing children's exposure to TSP.<sup>31,32</sup> Heavier smokers and those with no intentions to quit were more likely to allow smoking in the car, probably because it is more difficult for them to control

**Table 2** Characteristics of respondents and cars smoking rules<sup>a,b</sup>

| Parameter       | Germany-Rules for Smoking in Cars (N= 1,361) |                      |                      |                 |         | France-Rules for Smoking in Cars (N= 1,604) |         |         |                 |         | Netherlands-Rules for Smoking in Cars Carrying Children (N= 1,187) |         |         |                 |         |
|-----------------|----------------------------------------------|----------------------|----------------------|-----------------|---------|---------------------------------------------|---------|---------|-----------------|---------|--------------------------------------------------------------------|---------|---------|-----------------|---------|
|                 | OR <sup>c</sup>                              | 95% LCI <sup>d</sup> | 95% UCI <sup>d</sup> | % Allow Smoking | p-value | OR                                          | 95% LCI | 95% UCI | % Allow Smoking | p-value | OR                                                                 | 95% LCI | 95% UCI | % Allow Smoking | p-value |
| Sex             |                                              |                      |                      |                 |         |                                             |         |         |                 |         |                                                                    |         |         |                 |         |
| Female          | 1.00                                         |                      |                      | 50%             | ref     | 1.00                                        |         |         | 58%             | ref     | 1.00                                                               |         |         | 35%             | ref     |
| Male            | 1.23                                         | 0.95                 | 1.59                 | 54%             | 0.118   | 1.03                                        | 0.82    | 1.31    | 59%             | 0.776   | 1.03                                                               | 0.78    | 1.36    | 37%             | 0.853   |
| Age Group       |                                              |                      |                      |                 |         |                                             |         |         |                 |         |                                                                    |         |         |                 |         |
| 18–24           | 1.00                                         |                      |                      | 72%             | ref     | 1.00                                        |         |         | 72%             | ref     | 1.00                                                               |         |         | 39%             | ref     |
| 25–39           | 0.46                                         | 0.29                 | 0.74                 | 52%             | 0.001   | 0.73                                        | 0.49    | 1.11    | 62%             | 0.142   | 0.88                                                               | 0.57    | 1.35    | 36%             | 0.551   |
| 40–54           | 0.36                                         | 0.23                 | 0.55                 | 51%             | <.0001  | 0.53                                        | 0.35    | 0.79    | 56%             | 0.002   | 0.79                                                               | 0.52    | 1.20    | 40%             | 0.268   |
| 55+             | 0.22                                         | 0.14                 | 0.36                 | 41%             | <.0001  | 0.25                                        | 0.15    | 0.40    | 41%             | <.0001  | 0.51                                                               | 0.31    | 0.82    | 30%             | 0.006   |
| Education       |                                              |                      |                      |                 |         |                                             |         |         |                 |         |                                                                    |         |         |                 |         |
| Low             | 1.00                                         |                      |                      | 48%             |         | 1.00                                        |         |         | 58%             | ref     | 1.00                                                               |         |         | 42%             | ref     |
| Moderate        | 1.11                                         | 0.79                 | 1.57                 | 53%             | 0.553   | 1.09                                        | 0.84    | 1.42    | 61%             | 0.518   | 0.74                                                               | 0.54    | 1.01    | 34%             | 0.054   |
| High            | 1.21                                         | 0.86                 | 1.71                 | 54%             | 0.279   | 1.09                                        | 0.79    | 1.51    | 56%             | 0.610   | 0.60                                                               | 0.39    | 0.91    | 27%             | 0.017   |
| Minority Status |                                              |                      |                      |                 |         |                                             |         |         |                 |         |                                                                    |         |         |                 |         |
| Majority        | 1.00                                         |                      |                      | 52%             | ref     | 1.00                                        |         |         | 59%             | ref     | 1.00                                                               |         |         | 36%             | ref     |
| Minority        | 0.99                                         | 0.50                 | 1.95                 | 57%             | 0.981   | 1.11                                        | 0.77    | 1.60    | 60%             | 0.586   | 1.07                                                               | 0.66    | 1.73    | 37%             | 0.784   |
| Youngest Child  |                                              |                      |                      |                 |         |                                             |         |         |                 |         |                                                                    |         |         |                 |         |
| No children     | 1.00                                         |                      |                      | 55%             | ref     | 1.00                                        |         |         | 60%             | ref     | 1.00                                                               |         |         | 35%             | ref     |
| under 1         | 0.51                                         | 0.20                 | 1.29                 | 46%             | 0.153   | 0.52                                        | 0.27    | 1.01    | 49%             | 0.052   | 0.66                                                               | 0.29    | 1.49    | 32%             | 0.319   |
| 1–5 years       | 0.47                                         | 0.29                 | 0.77                 | 39%             | 0.002   | 0.94                                        | 0.66    | 1.34    | 65%             | 0.739   | 0.64                                                               | 0.39    | 1.05    | 29%             | 0.075   |
| 6–12 years      | 0.75                                         | 0.50                 | 1.11                 | 48%             | 0.152   | 0.56                                        | 0.40    | 0.78    | 50%             | 0.001   | 1.22                                                               | 0.79    | 1.86    | 46%             | 0.371   |
| 13–17 years     | 0.94                                         | 0.61                 | 1.45                 | 55%             | 0.784   | 0.93                                        | 0.63    | 1.37    | 61%             | 0.695   | 1.01                                                               | 0.63    | 1.63    | 39%             | 0.976   |
| Smoking Status  |                                              |                      |                      |                 |         |                                             |         |         |                 |         |                                                                    |         |         |                 |         |
| Weekly/Monthly  | 1.00                                         |                      |                      | 24%             | ref     | 1.00                                        |         |         | 34%             | ref     | 1.00                                                               |         |         | 12%             | ref     |
| Daily Smoker    | 4.48                                         | 2.59                 | 7.75                 | 55%             | <.0001  | 3.27                                        | 2.20    | 4.86    | 61%             | <.0001  | 4.46                                                               | 2.37    | 8.38    | 38%             | <.0001  |

a: Weighted analyses and percentages, sample size is not weighted  
 b: Controlling for all covariates in Table (Table 2)  
 c: OR = Odds Ratio  
 d: LCI = Lower Confidence Interval, UCI = Upper Confidence Interval

**Table 3** Smoking behaviour correlates of car smoking rules<sup>a,b</sup>

| Parameter            | Germany-Rules for Smoking in Cars (N= 1,361) |                      |         |                 |         | France-Rules for Smoking in Cars (N= 1,604) |         |         |                 |         | Netherlands-Rules for Smoking in Cars Carrying Children (N= 1,187) |         |         |                 |         |
|----------------------|----------------------------------------------|----------------------|---------|-----------------|---------|---------------------------------------------|---------|---------|-----------------|---------|--------------------------------------------------------------------|---------|---------|-----------------|---------|
|                      | OR <sup>c</sup>                              | 95% LCI <sup>d</sup> | 95% UCI | % Allow Smoking | p-value | OR                                          | 95% LCI | 95% UCI | % Allow Smoking | p-value | OR                                                                 | 95% LCI | 95% UCI | % Allow Smoking | p-value |
| Quit Intentions      |                                              |                      |         |                 |         |                                             |         |         |                 |         |                                                                    |         |         |                 |         |
| Intention to Quit    | 1.00                                         |                      |         | 46%             | ref     | 1.00                                        |         |         | 53%             | ref     | 1.00                                                               |         |         | 33%             | ref     |
| No Intention to Quit | 1.37                                         | 1.00                 | 1.87    | 55%             | 0.047   | 1.49                                        | 1.17    | 1.90    | 62%             | 0.001   | 0.98                                                               | 0.69    | 1.40    | 37%             | 0.929   |
| HSI <sup>e</sup>     | 1.51                                         | 1.36                 | 1.67    |                 | <.0001  | 1.51                                        | 1.37    | 1.67    |                 | <.0001  | 1.32                                                               | 1.19    | 1.46    |                 | <.0001  |
| 0–low                |                                              |                      |         | 34%             |         |                                             |         |         | 40%             |         |                                                                    |         |         | 16%             |         |
| 1                    |                                              |                      |         | 44%             |         |                                             |         |         | 56%             |         |                                                                    |         |         | 37%             |         |
| 2                    |                                              |                      |         | 44%             |         |                                             |         |         | 70%             |         |                                                                    |         |         | 33%             |         |
| 3                    |                                              |                      |         | 68%             |         |                                             |         |         | 69%             |         |                                                                    |         |         | 39%             |         |
| 4                    |                                              |                      |         | 76%             |         |                                             |         |         | 78%             |         |                                                                    |         |         | 46%             |         |
| 5                    |                                              |                      |         | 74%             |         |                                             |         |         | 75%             |         |                                                                    |         |         | 53%             |         |
| 6–high               |                                              |                      |         | 69%             |         |                                             |         |         | 65%             |         |                                                                    |         |         | 100%            |         |

a: Weighted analyses and percentages, sample size is not weighted  
 b: Controlling for all covariates in Tables 2 and 3  
 c: OR = Odds Ratio  
 d: LCI = Lower Confidence Interval, UCI = Upper Confidence Interval  
 e: Because HSI is a continuous variable, the OR refers to a per unit increase.

when they smoke. Previous studies have found similar relations between smoking behaviour and smoking rules in homes and cars.<sup>19,31</sup> Additional analyses not included in the results section tested for interactions of the predictors and found none were significant (i.e. differences in predictors by gender, education level, children in household/youngest child, and HSI).

The only modifiable correlate that predicted car smoking rules was smoking rules in the home. Interestingly, the prevalence of smoke-free homes in France and Germany is lower than the

prevalence of smoke-free cars, suggesting that it is easier for smokers to implement a smoke-free car policy.<sup>28</sup>

In the Netherlands, 36% of smokers reported that smoking in cars carrying children is always allowed. Predictors of allowing smoking in cars carrying children in the Netherlands were generally the same as predictors of car smoking rules in France and in Germany. Unlike France and Germany, smokers with lower education in the Netherlands were more likely to allow smoking in cars. A previous study of German smokers also found

**Table 4** Potentially modifiable correlates of car smoking rules<sup>a,b</sup>

| Parameter                          | Germany-Rules for Smoking in Cars (N=1,361) |                      |         |                 |         | France-Rules for Smoking in Cars (N= 1,604) |         |         |                 |         | Netherlands-Rules for Smoking in Cars Carrying Children (N= 1,187) |         |         |                 |         |
|------------------------------------|---------------------------------------------|----------------------|---------|-----------------|---------|---------------------------------------------|---------|---------|-----------------|---------|--------------------------------------------------------------------|---------|---------|-----------------|---------|
|                                    | OR <sup>c</sup>                             | 95% LCI <sup>d</sup> | 95% UCI | % Allow Smoking | p-value | OR                                          | 95% LCI | 95% UCI | % Allow Smoking | p-value | OR                                                                 | 95% LCI | 95% UCI | % Allow Smoking | p-value |
| Agree TSP dangerous to non-smokers |                                             |                      |         |                 |         |                                             |         |         |                 |         |                                                                    |         |         |                 |         |
| No                                 | 1.00                                        |                      |         | 59%             | ref     | 1.00                                        |         |         | 63%             | ref     | 1.00                                                               |         |         | 44%             | ref     |
| Yes                                | 1.18                                        | 0.72                 | 1.92    | 52%             | 0.518   | 0.75                                        | 0.36    | 1.57    | 59%             | 0.446   | 0.63                                                               | 0.46    | 0.86    | 31%             | 0.003   |
| Know TSP causes Lung Cancer        |                                             |                      |         |                 |         |                                             |         |         |                 |         |                                                                    |         |         |                 |         |
| No                                 | 1.00                                        |                      |         | 61%             | ref     | 1.00                                        |         |         | 54%             | ref     | 1.00                                                               |         |         | 42%             | ref     |
| Yes                                | 0.78                                        | 0.52                 | 1.19    | 51%             | 0.255   | 1.35                                        | 0.67    | 2.72    | 59%             | 0.405   | 0.98                                                               | 0.67    | 1.41    | 34%             | 0.891   |
| Don't know                         | 0.85                                        | 0.43                 | 1.69    | 54%             | 0.642   | 1.81                                        | 0.44    | 7.46    | 68%             | 0.412   | 0.71                                                               | 0.41    | 1.26    | 36%             | 0.244   |
| Rules for Smoking in the Home      |                                             |                      |         |                 |         |                                             |         |         |                 |         |                                                                    |         |         |                 |         |
| Never Allowed                      | 1.00                                        |                      |         | 30%             | ref     | 1.00                                        |         |         | 45%             | ref     | 1.00                                                               |         |         | 15%             | ref     |
| Allow everywhere/exceptions        | 3.48                                        | 2.54                 | 4.76    | 63%             | <.0001  | 2.20                                        | 1.64    | 2.95    | 63%             | <.0001  | 2.94                                                               | 1.88    | 4.59    | 40%             | <.0001  |

a: Weighted analyses and percentages, sample size is not weighted

b: Controlling for all covariates in Tables 2, 3, and 4

c: OR = Odds Ratio

d: LCI = Lower Confidence Interval, UCI = Upper Confidence Interval

childhood exposure to TSP in cars was associated with low socioeconomic status.<sup>16</sup> Surprisingly, having younger children did not significantly predict allowing smoking in cars in the Netherlands. Similar to France and Germany, smokers in the Netherlands with smoke-free homes were less likely to allow smoking in cars. However, unlike France and Germany, smokers in the Netherlands who did not agree that TSP was dangerous to non-smokers were more likely to allow smoking in cars carrying children. This different result in France and Germany may be due to the survey question which only asked about car smoking rules in general, and not about rules in cars carrying children. Indeed, a relation between allowing smoking in cars with non-smokers and knowledge of the health harms of TSP was found in the previous study that examined smoking in cars with non-smokers in Australia, Canada, the UK, and the USA.<sup>19</sup>

### Limitations and strengths

Some limitations of this study should be acknowledged. Because cross-sectional data was used, conclusions can only be made about associations between the predictor variables and car smoking rules. The measure for Germany and France is also limited because it asked about car smoking rules in general, and not in the presence of non-smokers, thus it is difficult to know how rules vary when non-smoking occupants are present or when smokers are alone. An additional limitation is that this study concentrated on individual level predictors of car smoking rules, whereas car smoking rules may also be related to household factors. The survey mode in the Netherlands (Internet) was also different from Germany and France (telephone). Key strengths of this study include the use of nationally representative samples, and that the examination of predictors of allowing smoking in cars that could be used to inform policy in adjusted analyses.

### Implications

Because smoke-free homes were associated with smoke-free cars, policies associated with increases in smoke-free homes, such as the introduction of comprehensive smoke-free laws, may promote smoke-free cars.<sup>31,33,34</sup> However, a recent review on the effects of comprehensive smoke-free laws found no effects of the implementation of smoke-free laws on exposure to TSP in cars.<sup>35</sup> Still, there does seem to be at least an association between smoking in cars and comprehensive smoke-free policies. For example, the previous study of smoking in cars with non-smokers across four countries found that reports of smoking in cars were lowest in Australia

(29%) where the history of smoke-free laws is longest and highest in USA (44%) where the history is shorter.<sup>19</sup> Another study of smokers in the USA showed that smokers who lived in states with lower smoking prevalence rates were more likely to have smoke-free homes, suggesting that implementation of smoking bans in private spaces may increase as smoking becomes less 'normal'.<sup>36</sup> Thus, these differences across countries could be due to both long-term denormalisation of smoking, and smoking in cars. A recent repeat cross-sectional study from England also showed that smoking in homes and cars decreased after the implementation of smoke-free legislation.<sup>37</sup>

The relation found in this study between agreeing that TSP is dangerous to non-smokers and never allowing smoking in cars with children in the Netherlands, suggests that policies to inform smokers about the harms of TSP could increase the adoption of smoke-free cars. Media campaigns could target smokers who are more likely to smoke in their cars (i.e., younger smokers, smokers with low education in the Netherlands). Previous research has indeed shown that among Dutch smokers with low education, only 1% think very often about the harm of smoking to others.<sup>38</sup> These types of initiatives may be particularly important for the Netherlands, where only 61% of smokers agree that TSP is dangerous to non-smokers.<sup>39</sup> Although, no significant relation was found between car smoking rules and knowledge of the dangers of TSP in France and Germany, media campaigns could still be useful; for instance, they could prime existing beliefs about the dangers of TSP, and make smokers aware that an implication of their beliefs is that they should not smoke in cars carrying non-smokers, and that opening a window cannot mitigate the dangers of exposure.<sup>40</sup>

### Acknowledgement

We would like to acknowledge support from the Propel Centre for Population Health Impact.

### Funding

National Health and Medical Research Council of Australia (265903) and (450110), Dr Geoffrey T. Fong was supported by a Senior Investigator Award from the Ontario Institute for Cancer Research and a Prevention Scientist Award from the Canadian Cancer Society Research Institute, Cancer Research UK (C312/A6465), U.S. National Cancer Institute (RO1 CA100362) and (P50 CA111236), Canadian Institutes of Health Research

(79551), French Institute for Health Promotion and Health Education (INPES), French National Cancer Institute (INCa), French Monitoring Centre for Drugs and Drug Addiction (OFDT), German Cancer Research Center, German Ministry of Health, Dieter Mennekes-Umweltstiftung, and The Netherlands Organisation for Health Research and Development (ZonMw 70000001). Sara Hitchman is financially supported by a Canadian Institutes of Health Research Doctoral Research Award. Ute Mons is financially supported by Klaus Tschira Foundation, gGmbH.

## References

- Öberg M, Jaakkola MS, Woodward A, Peruga A, Prüss-Ustün A. Worldwide burden of disease from exposure to second-hand smoke: A retrospective analysis of data from 192 countries. *Lancet* 2011;377(9760): 139–46.
- International Agency for Research on Cancer. [July 24, 2002]. IARC Monographs on the Evaluation of Carcinogenic Risks to Humans: Tobacco Smoke and Involuntary Smoking—Summary of Data Reported and Evaluation, [cited 2011 June 15]. Available at: <http://monographs.iarc.fr/ENG/Monographs/vol83/volume83.pdf>.
- U.S. Department of Health and Human Services. The Health Consequences of Involuntary Exposure to Tobacco Smoke: A Report of the Surgeon General—Executive Summary. U.S. Department of Health and Human Services, Centers for Disease Control and Prevention, Coordinating Center for Health Promotion, National Center for Chronic Disease Prevention and Health Promotion, Office on Smoking and Health. 2006.
- IOM (Institute of Medicine). Secondhand Smoke Exposure and Cardiovascular Effects: Making Sense of the Evidence. Washington, DC: The National Academies Press, 2010.
- Invernizzi G, Ruprecht AA, Mazza R, et al. Smoking in car: monitoring pollution of particulate matter, of organic volatile compounds and of carbon monoxide: The effect of opening the driver's window. *Epidemiol Prev* 2010;34(1–2): 35–42.
- Jones MR, Navas-Acien a, Yuan J, Brysre PN. Secondhand tobacco smoke concentrations in motor vehicles: A pilot study. *Tob Control* 2009;18(5): 399–404.
- Ott W, Klepeis N, Switzer P. Air change rates of motor vehicles and in-vehicle pollutant concentrations from secondhand smoke. *J Expo Sci Env Epid* 2008;18(3): 312–25.
- Rees VW, Connolly GN. Measuring air quality to protect children from secondhand smoke in cars. *Am J Prev Med* 2006;31(5): 363–8.
- Sendzik T, Fong GT, Travers MJ, Hyland A. An experimental investigation of tobacco smoke pollution in cars. *Nicotine Tob Res* 2009;11(6): 627–34.
- Vardavas CI, Linardakis M, Kafatos AG. Environmental tobacco smoke exposure in motor vehicles: a preliminary study. *Tob Control* 2006;15(5): 415.
- Sly PD, Deverell M, Kusel MM, Holt PG. Letter: Exposure to environmental tobacco smoke in cars increases the risk of persistent wheeze in adolescents. *Med J Australia* 2007;186(6): 322.
- Kabir Z, Manning PJ, Holohan J, Keogan S, Goodman PG, Clancy L. Second-hand smoke exposure in cars and respiratory health effects in children. *Eur Respir J* 2009;34(3): 629–33.
- Canadian Cancer Society. Laws banning smoking in vehicles carrying children—international overview. 2011. Apr 04.
- Bearer CF. Environmental health hazards: How children are different from adults. *Future Child* 2005;5:11–26.
- EUROBAROMETER 72.3. Special Eurobarometer 332, Tobacco; May 27, 2010; [cited 2011 June 21]. Available at: [http://ec.europa.eu/health/eurobarometers/index\\_en.htm](http://ec.europa.eu/health/eurobarometers/index_en.htm).
- Bolte G, Fromme H. Socioeconomic determinants of children's environmental tobacco smoke exposure and family's home smoking policy. *Eur J Public Health* 2009;19(1): 52–8.
- Crone MR, Hirasing RA, Burgmeijer RJF. Prevalence of passive smoking in infancy in the Netherlands. *Patient Educ Couns* 2000;39(2–3): 149–53.
- Hirasing RA, Gena SAD, Simon JG, Kossen-Boot H, Meulmeester JF, Oudenrijn van den C. Smoking in presence of the infant; A study among the well baby clinics [in Dutch]. *Ned Tijdschr Geneesk* 1994;138:1422–6.
- Hitchman SC, Fong GT, Borland R, Hyland A. Predictors of smoking in cars with nonsmokers: Findings from the 2007 Wave of the International Tobacco Control Four Country Survey. *Nicotine Tob Res* 2010;12(4): 374–80.
- Fong GT, Cummings KM, Borland R, et al. The conceptual framework of the International Tobacco Control (ITC) Policy Evaluation Project. *Tob Control* 2006;15(suppl\_3):iii3–11.
- WHO. Framework Convention on Tobacco Control. 2003. [cited 2011 June 21]. Available at: [http://www.who.int/fctc/text\\_download/en/index.html](http://www.who.int/fctc/text_download/en/index.html).
- Nagelhout GE, Willemsen MC, Thompson ME, Fong GT, van den Putte B, de Vries H. Is web interviewing a good alternative to telephone interviewing? Findings from the International Tobacco Control (ITC) Netherlands Survey. *BMC Public Health* 2010;10(1): 351.
- Thompson ME, Fong GT, Hammond D, et al. Methods of the International Tobacco Control (ITC) Four Country Survey. *Tob Control* 2006;15(Suppl 3iii):12–8.
- International Tobacco Control Policy Evaluation Project. ITC France National Report. 2009. February; [cited 2011 June 17]. Available from: <http://www.itcproject.org/keyfindi/itcfrancen>.
- International Tobacco Control Policy Evaluation Project. ITC Germany Technical Report, Waves 1–2. 2010. May; [cited 2011 June 17]. Available from: [http://www.itcproject.org/documents/countries/germany/de\\_w12\\_techreport\\_july6\\_2010revpdf](http://www.itcproject.org/documents/countries/germany/de_w12_techreport_july6_2010revpdf).
- International Tobacco Control Policy Evaluation Project. ITC Netherlands Technical Report, Waves 1–3. 2009. December; [cited 2011 June 17]. Available from: [http://www.itcproject.org/documents/countries/netherlands/nl\\_w13\\_techreport\\_july62010revpdf](http://www.itcproject.org/documents/countries/netherlands/nl_w13_techreport_july62010revpdf).
- Heatherton TF, Kozlowski LT, Frecker RC, et al. Measuring the heaviness of smoking: Using self-reported time to the first cigarette of the day and number of cigarettes smoked per day. *Addiction* 1989;84:791–800.
- International Tobacco Control Policy Evaluation Project. ITC Germany Wave 2 National Report. 2010. January; [cited 2011 June 22]. Available from: <http://www.itcproject.org/keyfindi/itcgermanywave2nationalreportjan2010final.pdf>.
- Matt GE, Romero R, Ma DS, et al. Tobacco use and asking prices of used cars: Prevalence, costs, and new opportunities for changing smoking behavior. *Tob Induc Dis* 2008;4(1): 2.
- Wen CP, Tsai SP, Cheng TY, Chan HT, Chung WSL, Chen CJ. Excess injury mortality among smokers: a neglected tobacco hazard. *Tob Control* 2005;14(Suppl 1):i28–32.
- Borland R, Yong H–H, Cummings KM, Hyland A, Anderson S, Fong GT. Determinants and consequences of smoke-free homes: Findings from the International Tobacco Control (ITC) Four Country Survey. *Tob Control* 2006;15(Suppl 3iii):42–50.
- Crone MR, Reijneveld SA, Burgmeijer RJ, et al. Factors that influence passive smoking in infancy: A study among mothers of newborn babies in The Netherlands. *Prev Med* 2001;32:209–17.
- Fong GT, Hyland A, Borland R, et al. Reductions in tobacco smoke pollution and increases in support for smoke-free public places following the implementation of comprehensive smoke-free workplace legislation in the Republic of Ireland: Findings from the ITC Ireland/UK Survey. *Tob Control* 2006;15(Suppl 3iii):51–8.
- Sims M, Tomkins S, Judge K, Taylor G, Jarvis MJ, Gilmore A. Trends in and predictors of second-hand smoke exposure indexed by cotinine in children in England from 1996 to 2006. *Addiction* 2010;105:543–553.
- Callinan JE, Clarke A, Doherty K, Kelleher C. Legislative smoking bans for reducing secondhand smoke exposure, smoking prevalence and tobacco consumption. *Cochrane Database of Systematic Reviews* 4CD005992.
- Levy DT, Romano E, Mumford EA. Recent trends in home and work smoking bans. *Tob Control* 2004. Sep;13(3):258–63.
- Lee JT, Glantz SA, Millett C. Effect of smoke-free legislation on adult smoking behaviour in England in the 18 months following implementation. *PLoS One* 2011;6(6): e20933.
- Nagelhout GE, Mons U, Allwright S, et al. Prevalence and predictors of smoking in “smoke-free” bars. Findings from the International Tobacco Control (ITC) Europe Surveys. *Soc Sci Med* 2011;72(10): 1643–51.
- Sheldon T. Dutch smokers are “alarmingly” ignorant of harms of passive smoking, study finds. *BMJ* 2011: 342–d2138.
- Fishbein M, Cappella JN. The Role of Theory in Developing Effective Health Communications. *J Commun* 2006;56(s1):S1–S17.
